# Supplementary material for: Combining QTL-seq and linkage mapping to fine map a wild soybean allele characteristic of greater plant height
Source: PubMed Central journal article supplement (PMC5870336; doi:10.1186/s12864-018-4582-4), 2018-03-27
Supplement: 12864_2018_4582_MOESM2_ESM.pdf [file 12864_2018_4582_MOESM2_ESM.pdf]

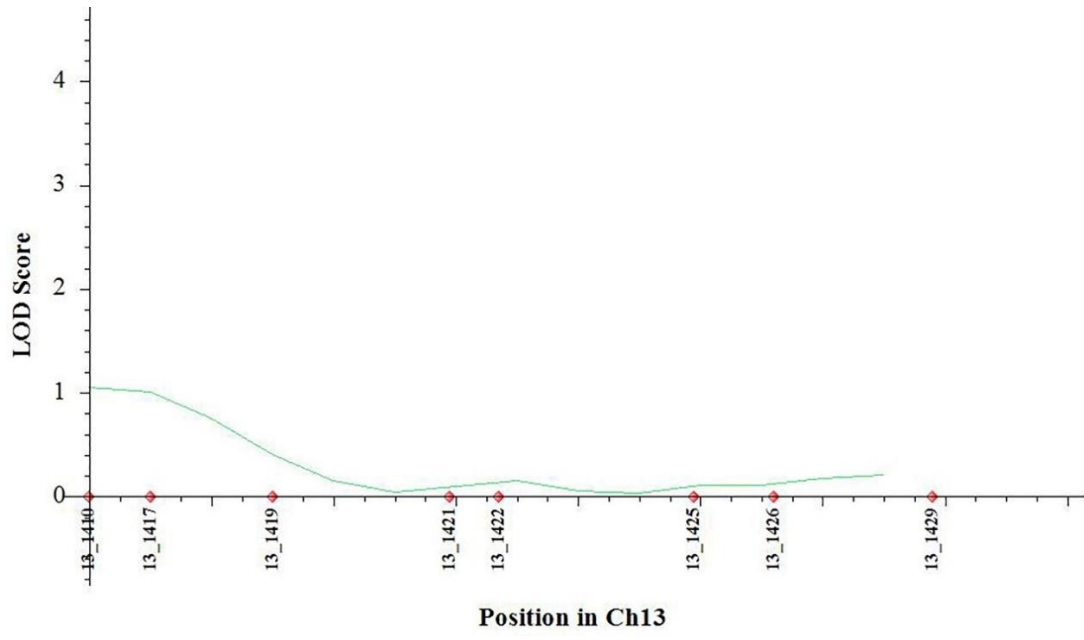

**Fig. S1** Distribution of the LOD scores for days to flowering in the target region detected by QTL-seq.
