# Supplementary material for: Combining QTL-seq and linkage mapping to fine map a wild soybean allele characteristic of greater plant height
Source: PubMed Central journal article supplement (PMC5870336; doi:10.1186/s12864-018-4582-4), 2018-03-27
Supplement: 12864_2018_4582_MOESM5_ESM.pdf [file 12864_2018_4582_MOESM5_ESM.pdf]

|                        |                                                                                                             |     |
|------------------------|-------------------------------------------------------------------------------------------------------------|-----|
| P1-Glyma.13g249300.txt | <b>EGLYMAGMERIEFTLLFLVTCVLLSLFPTALEAEDAITPPQTISGYQTLVSPSQNFELGFFSPGNSTHIVLGIWYKRIKQTVIIVWANRDKPLVNSGGS</b>  | 100 |
| P2-Glyma.13g249300.txt | <b>EGLYMAGMERIEFTLLFLVTCVLLSLFPTALEAEDAITPPQTISGYQTLVSPSQNFELGFFSPGNSTHIVLGIWYKRIKQTVIIVWANRDKPLVNSGGS</b>  | 100 |
| Consensus              | pglymagmertefllflvtccyllslfptaleaedaippqtisgyqtlvpsqnfelgffspgnsthiylgiwykhipkqtviiwanrdkplvnsqgs           |     |
| P1-Glyma.13g249300.txt | <b>LTFSNNGKLIILSHTGVSVMSSNSGGPARNFVAHLIDSGNFVLDYGNEGHLWESFDYPSDTLIPGMKLGWNFKTGLNRHLTSWKSSSNPSSGEYTYGVD</b>  | 200 |
| P2-Glyma.13g249300.txt | <b>LTFSNNGKLIILSHTGVSVMSSNSGGPARNFVAHLIDSGNFVLDYGNEGHLWESFDYPSDTLIPGMKLGWNFKTGLNRHLTSWKSSSNPSSGEYTYGVD</b>  | 200 |
| Consensus              | ltfsmngkllilshgtgsvvmssnsggparnpvahllidsgnfvldygneghlwesfdypsdtlipgmklgwnfktglnrhltswksssnpsgeytygvd        |     |
| P1-Glyma.13g249300.txt | <b>PRGIPQLFLHKGKRVFRSGPWYQQFKGDFVLSANFVFRPIFVFDSEVSYSETKDTIIVSRFVLSQSGLIQHFSWNDHSSWFSEFSVQGDRCDDYGL</b>     | 300 |
| P2-Glyma.13g249300.txt | <b>PRGIPQLFLHKGKRVFRSGPWYQQFKGDFVLSANFVFRPIFVFDSEVSYSETKDTIIVSRFVLSQSGLIQHFSWNDHSSWFSEFSVQGDRCDDYGL</b>     | 300 |
| Consensus              | prgipqlflhkgkrrvfrsgpwyqqfkgdvpvlsanpvfrpifvfdsevsysetkdtivsrfvlsqsgliqhfswndhsswfsefsvqgdrcddygl           |     |
| P1-Glyma.13g249300.txt | <b>CGAYGSCNIKSSVCKCLKGFDPKLPQEWKNEWSSGGCVRKNSQVFSNGDTFKQFTGMKLPDAAEFHTNYTISSDHCEAECMNCSCVAYAKLDVNASGK</b>   | 400 |
| P2-Glyma.13g249300.txt | <b>CGAYGSCNIKSSVCKCLKGFDPKLPQEWKNEWSSGGCVRKNSQVFSNGDTFKQFTGMKLPDAAEFHTNYTISSDHCEAECMNCSCVAYAKLDVNASGK</b>   | 400 |
| Consensus              | cgaygscniksspvckclkgfdpklpqeweknewsggcvrknsqvfsngdtfkqftgmklpdaaefhtnytiessdhceaecsmncscvayakldvnaqsk       |     |
| P1-Glyma.13g249300.txt | <b>GCIVWFGDLFIIREVSVNGEDFYVRVPASEVKGKIKGENVDGNKRKLLIFPVTA FVSSTIIIVSALWLIKKCRKRKREKETSQFSVGRARSERNEFKLP</b> | 500 |
| P2-Glyma.13g249300.txt | <b>GCIVWFGDLFIIREVSVNGEDFYVRVPASEVKGKIKGENVDGNKRKLLIFPVTA FVSSTIIIVSALWLIKKCRKRKREKETSQFSVGRARSERNEFKLP</b> | 500 |
| Consensus              | gcivwfgdlfiirevsvngedfyvrvpasevkgkikgenv dgnkrkllifpvtafvssstiiivsawl iikkcrkrkretsqfsvgrarsernefklp        |     |
| P1-Glyma.13g249300.txt | <b>LFEAIIIEAATENFSLYKIGEGGFHVKYKQLPSSGQEIIVKRLSENSGGLQEFKNEVILISQLQHRNLVKLLGCCIHGEDKMLVVEYMPNRSLSLDF</b>    | 600 |
| P2-Glyma.13g249300.txt | <b>LFEAIIIEAATENFSLYKIGEGGFHVKYKQLPSSGQEIIVKRLSENSGGLQEFKNEVILISQLQHRNLVKLLGCCIHGEDKMLVVEYMPNRSLSLDF</b>    | 600 |
| Consensus              | lfeaiaieaatenfslynkigeggfghvykqqlpsgqeiavkr lsen sgglqefknevilisqlqhrnlvklgccihgedkmlvveympnrslsdlf         |     |
| P1-Glyma.13g249300.txt | <b>DETRKRSVLSWCKRLDIIIGIARGLLYLHRDSRLRIIHRDLKASNVLLDGMNPKISDFGMARFGGDQTEAKTRIVCTYGYMSPEYAIIDGHFSEKSDVY</b>  | 700 |
| P2-Glyma.13g249300.txt | <b>DETRKRSVLSWCKRLDIIIGIARGLLYLHRDSRLRIIHRDLKASNVLLDGMNPKISDFGMARFGGDQTEAKTRIVCTYGYMSPEYAIIDGHFSEKSDVY</b>  | 700 |
| Consensus              | detkrsvlswckrldiigiargllylhrdsrlriihrdlkasnvlldgemnpkisdfgmarfggdqteaktkrivctygymspeyaidghfseksdvy          |     |
| P1-Glyma.13g249300.txt | <b>SFGVLLLELLSGKKNKGFIIHPDHKLNLLGHAWKLWNEDRALELMDALLENQFPTSEALRCIQVGLSCIQQHPEDRPTNSSVLLMFDSESVLPQGRGRL</b>  | 800 |
| P2-Glyma.13g249300.txt | <b>SFGVLLLELLSGKKNKGFIIHPDHKLNLLGHAWKLWNEDRALELMDALLENQFPTSEALRCIQVGLSCIQQHPEDRPTNSSVLLMFDSESVLPQGRGRL</b>  | 800 |
| Consensus              | sfqvllellsgkknkgfihpdhkl nllghawklwnedralelmdallenqfptsealrciqvglsciqqhpedrptnssvllmfdsesvlpqgrgrl          |     |
| P1-Glyma.13g249300.txt | <b>YSERFFSGTNSSSRGGLSGNSNDITVTLVEG</b>                                                                      | 831 |
| P2-Glyma.13g249300.txt | <b>YSERFFSGTNSSSRGGLSGNSNDITVTLVEG</b>                                                                      | 831 |
| Consensus              | yserffsgtnsssrqglnsgnditvtlveg                                                                              |     |

**Fig. S3 Multiple sequence alignment depicting the amino acid sequence conservation of P1 (CSSL3228) *Glyma.13g249300* gene with P2 (NN1138-2) gene (*Glyma.13g249300*) in soybean.**
