# Supplementary material for: Combining QTL-seq and linkage mapping to fine map a wild soybean allele characteristic of greater plant height
Source: PubMed Central journal article supplement (PMC5870336; doi:10.1186/s12864-018-4582-4), 2018-03-27
Supplement: 12864_2018_4582_MOESM6_ESM.pdf [file 12864_2018_4582_MOESM6_ESM.pdf]

|                        |                                                                                                          |     |
|------------------------|----------------------------------------------------------------------------------------------------------|-----|
| P1-Glyma.13g249600.txt | PGLYMAGMATFVVIVVYVSTYGHVEKLAREIEKGAASVEGVEAKLWQVPETLPEEVLAKLGAPFKSDVPIITPNELPEADGFLFGFFTRFGSMAAQFKAFF    | 100 |
| P2-Glyma.13g249600.txt | PGLYMAGMATFVVIVVYVSTYGHVEKLAREIEKGAASVEGVEAKLWQVPETLPEEVLAKLGAPFKSDVPIITPNELPEADGFLFGFFTRFGSMAAQFKAFF    | 100 |
| Consensus              | pqlymagmatkvyivvyystyghveklareiekgaasvegveaklwqvpetylpeevlaklgappksdvpittpnelpeadgflfgfptrfgsmaaqaqfkaff |     |
| P1-Glyma.13g249600.txt | DATGGLWRTQPLAGKAAGFFVSTSSQGGGCETIPLTSLITQLVHHGLIFVPIGYTFGGGMFELEKVKGGSPYVAGTYACDGSRCPSELELAQAFHQGKYFA    | 200 |
| P2-Glyma.13g249600.txt | DATGGLWRTQPLAGKAAGFFVSTSSQGGGCETIPLTSLITQLVHHGLIFVPIGYTFGGGMFELEKVKGGSPYVAGTYACDGSRCPSELELAQAFHQGKYFA    | 200 |
| Consensus              | datgglwrtqalagkaagffvstssqgggqettpltslitqlvhhgllfvpiqytfgggmfelekvkggspygagtyacdgsrqpselelaqafhqgkyfa    |     |
| P1-Glyma.13g249600.txt | GIARKKLKGS                                                                                               | 209 |
| P2-Glyma.13g249600.txt | GIARKKLKGS                                                                                               | 209 |
| Consensus              | giakklkgs                                                                                                |     |

**Fig. S4 Multiple sequence alignment depicting the amino acid sequence conservation of P1 (CSSL3228) *Glyma.13g249600* gene with P2 (NN1138-2) gene (*Glyma.13g249600*) in soybean.**
